# Supplementary material
Source: publisher site journal article supplement (https://content.cld.iop.org/journals/1748-9326/16/6/065001/revision2/erlabf06csupp1.pdf)
Supplement: Supplementary file 1 [file erlabf06csupp1.pdf]

| Region                  | Species                        | Common Name                                    | Order       | Process             | Stage               | Protein (g/100g DM) | Iron (mg/100g DM) | Folate (mcg DFE/100g DM) | Vitamin B12 (mcg/100g DM) | Reference                     |
|-------------------------|--------------------------------|------------------------------------------------|-------------|---------------------|---------------------|---------------------|-------------------|--------------------------|---------------------------|-------------------------------|
| Sub-Saharan Africa      | <i>Rhynchophorus phoenicis</i> | African Palm Weevil                            | Coleoptera  | DRY                 | LARVAE              | 33.0                | 14.7              |                          |                           | Tang et al., 2019             |
| Sub-Saharan Africa      | <i>Rhynchophorus phoenicis</i> | African Palm Weevil                            | Coleoptera  | DRY                 | LARVAE (Late Stage) | 10.5                | 0.6               |                          |                           | Omotoso and Aedire, 2007      |
| Sub-Saharan Africa      | <i>Rhynchophorus phoenicis</i> | African Palm Weevil                            | Coleoptera  | DRY                 | LARVAE              | 29.9                | 69.3              |                          |                           | Ehounou et al., 2019          |
| Sub-Saharan Africa      | <i>Rhynchophorus phoenicis</i> | African Palm Weevil                            | Coleoptera  | DRY                 | LARVAE              | 28.4                | 12.2              |                          |                           | Banjo et al., 2006            |
| Sub-Saharan Africa      | <i>Rhynchophorus phoenicis</i> | African Palm Weevil                            | Coleoptera  | DRY                 | LARVAE              | 23.4                |                   |                          |                           | Opara et al., 2012            |
| Sub-Saharan Africa      | <i>Rhynchophorus phoenicis</i> | African Palm Weevil                            | Coleoptera  | DRY                 | LARVAE              |                     |                   |                          |                           | Elemo et al., 2011            |
| Sub-Saharan Africa      | <i>Rhynchophorus phoenicis</i> | African Palm Weevil                            | Coleoptera  | DRY                 | LARVAE              |                     |                   |                          |                           | Santos Oliveira et al., 1976  |
| Sub-Saharan Africa      | <i>Rhynchophorus phoenicis</i> | African Palm Weevil                            | Coleoptera  | DRY                 | LARVAE              | 52.9                | 7.0               |                          |                           | 2.77 Okunowo et al., 2017     |
| Sub-Saharan Africa      | <i>Rhynchophorus phoenicis</i> | African Palm Weevil                            | Coleoptera  | DRY                 | LARVAE              | 32.8                | 0.9               | 200                      |                           | 20.00 Parker et al., 2020     |
| Sub-Saharan Africa      | <i>Ruspolia differens</i>      | Green Cone-Headed Cricket                      | Orthoptera  | DRY                 | ADULT               |                     | 13.0              |                          |                           | Tang et al., 2019             |
| Sub-Saharan Africa      | <i>Ruspolia differens</i>      | Green Cone-Headed Cricket                      | Orthoptera  | DRY                 | ADULT               |                     |                   | 340                      |                           | Kinyuru et al., 2010a         |
| Sub-Saharan Africa      | <i>Ruspolia differens</i>      | Green Cone-Headed Cricket                      | Orthoptera  | DRY                 | ADULT               |                     |                   | 350                      |                           | Kinyuru et al., 2010a         |
| Sub-Saharan Africa      | <i>Ruspolia differens</i>      | Green Cone-Headed Cricket                      | Orthoptera  | DRY                 | ADULT               | 43.1                | 16.6              | 900                      |                           | Kinyuru et al., 2010b         |
| Sub-Saharan Africa      | <i>Ruspolia differens</i>      | Green Cone-Headed Cricket                      | Orthoptera  | DRY                 | ADULT               | 44.3                | 13.0              |                          |                           | Kinyuru et al., 2010b         |
| Sub-Saharan Africa      | <i>Ruspolia differens</i>      | Green Cone-Headed Cricket                      | Orthoptera  | DRY                 | ADULT               | 40.0                | 48.6              |                          |                           | 1.04 Ssepuuya et al., 2019    |
| Sub-Saharan Africa      | <i>Ruspolia differens</i>      | Green Cone-Headed Cricket                      | Orthoptera  | DRY                 | ADULT               | 47.7                |                   |                          |                           | Fombong et al., 2017          |
| Sub-Saharan Africa      | <i>Ruspolia differens</i>      | Green Cone-Headed Cricket                      | Orthoptera  | DRY                 | ADULT               | 44.6                | 2.0               |                          |                           | Siulapwa et al., 2014         |
| Sub-Saharan Africa      | <i>Gonimbrasia belina</i>      | Mopane Worm                                    | Lepidoptera | DRY (whole)         | LARVAE              | 57.0                | 26.7              |                          |                           | Siulapwa et al., 2014         |
| Sub-Saharan Africa      | <i>Gonimbrasia belina</i>      | Mopane Worm                                    | Lepidoptera | DRY (whole)         | LARVAE              | 52.1                |                   |                          |                           | Madibela et al., 2009         |
| Sub-Saharan Africa      | <i>Gonimbrasia belina</i>      | Mopane Worm                                    | Lepidoptera | DRY (roasted)       | LARVAE              | 48.3                | 30.4              |                          |                           | Glew et al., 1999             |
| Sub-Saharan Africa      | <i>Gonimbrasia belina</i>      | Mopane Worm                                    | Lepidoptera | DRY (meal, whole)   | LARVAE              | 55.0                | 12.7              |                          |                           | Moreki et al., 2012           |
| Sub-Saharan Africa      | <i>Gonimbrasia belina</i>      | Mopane Worm                                    | Lepidoptera | DRY (meal, whole)   | LARVAE              | 54.0                |                   |                          |                           | Manyeula et al., 2018         |
| Sub-Saharan Africa      | <i>Gonimbrasia belina</i>      | Mopane Worm                                    | Lepidoptera | DRY (meal)          | LARVAE              | 56.8                | 11.6              |                          |                           | Rapatsa and Moyo, 2017        |
| Sub-Saharan Africa      | <i>Gonimbrasia belina</i>      | Mopane Worm                                    | Lepidoptera | DRY (degutted)      | LARVAE              | 69.8                | 31.2              |                          |                           | Nantanga and Amakali, 2020    |
| Sub-Saharan Africa      | <i>Gonimbrasia belina</i>      | Mopane Worm                                    | Lepidoptera | DRY                 | LARVAE              | 62.0                | 31.0              |                          |                           | Dreyer and Wehmeyer, 1982     |
| Sub-Saharan Africa      | <i>Locusta migratoria</i>      | Migratory Locust                               | Orthoptera  | DRY                 | ADULT               | 50.4                | 0.1               |                          |                           | Mohamed, 2015                 |
| Sub-Saharan Africa      | <i>Locusta migratoria</i>      | Migratory Locust                               | Orthoptera  | DRY                 | ADULT               | 59.0                | 12.4              |                          |                           | Ooninx and van der Poel, 2010 |
| Sub-Saharan Africa      | <i>Locusta migratoria</i>      | Migratory Locust                               | Orthoptera  | DRY                 | ADULT               |                     |                   |                          |                           | 0.84 Schmidt et al., 2019     |
| Sub-Saharan Africa      | <i>Locusta migratoria</i>      | Migratory Locust                               | Orthoptera  | DRY                 | ADULT               | 50.8                |                   |                          |                           | Clarkson et al., 2018         |
| Sub-Saharan Africa      | <i>Gryllus bimaculatus</i>     | Two-Spotted Cricket / African Field Cricket    | Orthoptera  | DRY                 | LATE NYMPH          | 58.3                | 9.7               |                          |                           | Ghosh et al., 2017            |
| Sub-Saharan Africa      | <i>Gryllus bimaculatus</i>     | Two-Spotted Cricket / African Field Cricket    | Orthoptera  | DRY                 | ADULT               | 60.7                | 7.2               |                          |                           | Udomsil et al., 2019          |
| Sub-Saharan Africa      | <i>Gryllus bimaculatus</i>     | Two-Spotted Cricket / African Field Cricket    | Orthoptera  | DRY                 | ADULT               |                     |                   | 12.9                     |                           | Latunde-Dada et al., 2016     |
| Sub-Saharan Africa      | <i>Gryllus bimaculatus</i>     | Two-Spotted Cricket / African Field Cricket    | Orthoptera  | DRY                 | ADULT               | 57.0                |                   |                          |                           | Taufek et al., 2016           |
| Sub-Saharan Africa      | <i>Gryllus assimilis</i>       | 1 Black Field Cricket / Jamaican Field Cricket | Orthoptera  | DRY                 | ADULT               |                     |                   |                          |                           | 2.88 Schmidt et al., 2019     |
| Sub-Saharan Africa      | <i>Acheta domesticus</i>       | 1 House cricket                                | Orthoptera  | converted to DRY    | ADULT               | 60.0                | 6.4               | 389                      |                           | 70.20 Finke, 2015             |
| Sub-Saharan Africa      | <i>Cirina forda</i>            | Emperor Shea Moth                              | Coleoptera  | DRY                 | LARVAE              | 55.5                | 5.3               |                          |                           | Omotoso, 2006                 |
| Sub-Saharan Africa      | <i>Cirina forda</i>            | Emperor Shea Moth                              | Coleoptera  | DRY                 | LARVAE              | 52.6                | 5.6               |                          |                           | Nigeria Food Database, 2019   |
| Sub-Saharan Africa      | <i>Cirina forda</i>            | Emperor Shea Moth                              | Coleoptera  | DRY                 | LARVAE              | 33.1                | 64.0              |                          |                           | Akinnawo and Ketiku, 2000     |
| Sub-Saharan Africa      | <i>Cirina forda</i>            | Emperor Shea Moth                              | Coleoptera  | DRY                 | LARVAE              | 20.0                | 1.3               |                          |                           | Osasona and Olaofe, 2010      |
| Sub-Saharan Africa      | <i>Cirina forda</i>            | Emperor Shea Moth                              | Coleoptera  | DRY                 | LARVAE              | 52.6                | 5.6               |                          |                           | Adepoju and Daboh, 2013       |
| Sub-Saharan Africa      | <i>Cirina forda</i>            | Emperor Shea Moth                              | Coleoptera  | DRY                 | LARVAE              | 55.4                | 46.7              |                          |                           | Igbabul et al., 2015          |
| Sub-Saharan Africa      | <i>Cirina forda</i>            | Emperor Shea Moth                              | Coleoptera  | DRY                 | LARVAE              | 20.2                | 1.8               |                          |                           | Banjo et al., 2006            |
| East and Southeast Asia | <i>Bombyx mori</i>             | Domesticated Silkworm                          | Lepidoptera | DRY                 | LARVAE              | 64.7                |                   |                          |                           | Frye et al., 1989             |
| East and Southeast Asia | <i>Bombyx mori</i>             | Domesticated Silkworm                          | Lepidoptera | DRY                 | LARVAE              | 62.7                |                   |                          |                           | Frye et al., 1989             |
| East and Southeast Asia | <i>Bombyx mori</i>             | Domesticated Silkworm                          | Lepidoptera | converted to DRY    | LARVAE              | 53.8                | 9.5               | 410                      |                           | 0.00 Finke, 2002              |
| East and Southeast Asia | <i>Bombyx mori</i>             | Domesticated Silkworm                          | Lepidoptera | DRY                 | LARVAE              | 53.0                | 12.1              |                          |                           | Dierenfeld, 2002              |
| East and Southeast Asia | <i>Bombyx mori</i>             | Domesticated Silkworm                          | Lepidoptera | DRY                 | LARVAE              | 61.2                |                   |                          |                           | Kovitvadhii et al., 2019      |
| East and Southeast Asia | <i>Bombyx mori</i>             | Domesticated Silkworm                          | Lepidoptera | Freeze-dried powder | LARVAE              | 70.1                | 3.5               | 188                      |                           | 0.52 Tong et al., 2011        |
| East and Southeast Asia | <i>Bombyx mori</i>             | Domesticated Silkworm                          | Lepidoptera | DRY                 | LARVAE              | 58.0                |                   |                          |                           | Ramos-Elorduy et al., 1997    |
| East and Southeast Asia | <i>Bombyx mori</i>             | Domesticated Silkworm                          | Lepidoptera | converted to DRY    | LARVAE              | 69.8                |                   |                          |                           | Finke, 2007                   |
| East and Southeast Asia | <i>Bombyx mori</i>             | Domesticated Silkworm                          | Lepidoptera | DRY                 | PUPA                | 50.4                |                   |                          |                           | Kovitvadhii et al., 2019      |
| East and Southeast Asia | <i>Bombyx mori</i>             | Domesticated Silkworm                          | Lepidoptera | DRY                 | PUPA                | 55.6                |                   |                          |                           | Tomotake et al., 2010         |
| East and Southeast Asia | <i>Bombyx mori</i>             | Domesticated Silkworm                          | Lepidoptera | DRY                 | PUPA                | 53.1                |                   |                          |                           | Chieco et al., 2019           |
| East and Southeast Asia | <i>Bombyx mori</i>             | Domesticated Silkworm                          | Lepidoptera | DRY                 | PUPA                | 56.4                |                   |                          |                           | Chieco et al., 2019           |
| East and Southeast Asia | <i>Bombyx mori</i>             | Domesticated Silkworm                          | Lepidoptera | converted to DRY    | PUPA                | 55.0                |                   |                          |                           | Lamberti et al., 2019         |
| East and Southeast Asia | <i>Bombyx mori</i>             | Domesticated Silkworm                          | Lepidoptera | converted to DRY    | PUPA                | 56.3                |                   |                          |                           | Lamberti et al., 2019         |
| East and Southeast Asia | <i>Bombyx mori</i>             | Domesticated Silkworm                          | Lepidoptera | converted to DRY    | PUPA                | 65.9                |                   |                          |                           | Rangacharyulu et al., 2003    |
| East and Southeast Asia | <i>Bombyx mori</i>             | Domesticated Silkworm                          | Lepidoptera | converted to DRY    | PUPA                | 49.5                | 9.3               |                          |                           | Yhoung-Aree et al., 1997      |
| East and Southeast Asia | <i>Bombyx mori</i>             | Domesticated Silkworm                          | Lepidoptera | DRY                 | PUPA                | 60.0                | 3.5               |                          |                           | Kuntadi et al., 2018          |
| East and Southeast Asia | <i>Bombyx mori</i>             | Domesticated Silkworm                          | Lepidoptera | converted to DRY    | UNSPECIFIED         | 59.2                | 3.1               |                          |                           | Dignan et al., 2004           |
| East and Southeast Asia | <i>Tenebrio molitor</i>        | Yellow Mealworm                                | Coleoptera  | DRY                 | LARVAE              | 66.1                |                   |                          |                           | Ghaly and Alkoaik, 2009       |
| East and Southeast Asia | <i>Tenebrio molitor</i>        | Yellow Mealworm                                | Coleoptera  | converted to DRY    | LARVAE              | 59.8                | 6.7               | 498                      |                           | 0.42 Finke, 2015              |
| East and Southeast Asia | <i>Tenebrio molitor</i>        | Yellow Mealworm                                | Coleoptera  | DRY                 | LARVAE              | 50.1                |                   |                          |                           | Alves et al., 2016            |
| East and Southeast Asia | <i>Tenebrio molitor</i>        | Yellow Mealworm                                | Coleoptera  | DRY                 | LARVAE              | 58.4                |                   |                          |                           | Barroso et al., 2014          |
| East and Southeast Asia | <i>Tenebrio molitor</i>        | Yellow Mealworm (Giant)                        | Coleoptera  | converted to DRY    | LARVAE              | 47.2                | 5.5               | 300                      |                           | 0.33 Finke, 2002              |
| East and Southeast Asia | <i>Tenebrio molitor</i>        | Yellow Mealworm                                | Coleoptera  | converted to DRY    | LARVAE              | 49.1                | 5.4               | 412                      |                           | 1.23 Finke, 2002              |
| East and Southeast Asia | <i>Tenebrio molitor</i>        | Yellow Mealworm (Giant)                        | Coleoptera  | converted to DRY    | LARVAE              | 49.4                |                   |                          |                           | Finke, 2007                   |

|                               |                                  |                                                |             |                  |              |      |     |      |                               |
|-------------------------------|----------------------------------|------------------------------------------------|-------------|------------------|--------------|------|-----|------|-------------------------------|
| East and Southeast Asia       | <i>Tenebrio molitor</i>          | Yellow Mealworm                                | Coleoptera  | DRY              | LARVAE       | 53.0 |     |      | Kovitvadhi et al., 2019       |
| East and Southeast Asia       | <i>Tenebrio molitor</i>          | Yellow Mealworm                                | Coleoptera  | DRY              | LARVAE       | 38.3 | 4.1 |      | Kuntadi et al., 2018          |
| East and Southeast Asia       | <i>Tenebrio molitor</i>          | Yellow Mealworm                                | Coleoptera  | DRY              | LARVAE       | 49.1 |     |      | Liu et al., 2020              |
| East and Southeast Asia       | <i>Tenebrio molitor</i>          | Yellow Mealworm                                | Coleoptera  | DRY              | LARVAE       |      |     | 7.0  | Latunde-Dada et al., 2016     |
| East and Southeast Asia       | <i>Tenebrio molitor</i>          | Yellow Mealworm                                | Coleoptera  | DRY              | LARVAE       | 46.4 |     | 6.7  | Ravzanadadi et al., 2012      |
| East and Southeast Asia       | <i>Tenebrio molitor</i>          | Yellow Mealworm                                | Coleoptera  | DRY              | LARVAE       | 51.5 |     |      | Zhao et al., 2016             |
| East and Southeast Asia       | <i>Tenebrio molitor</i>          | Yellow Mealworm                                | Coleoptera  | DRY              | LARVAE       |      |     |      | 1.08 Schmidt et al., 2019     |
| East and Southeast Asia       | <i>Tenebrio molitor</i>          | Yellow Mealworm                                | Coleoptera  | DRY              | LARVAE       | 52.4 |     | 3.3  | Zielińska et al., 2015        |
| East and Southeast Asia       | <i>Rhynchophorus ferrugineus</i> | Asian Palm Weevil / Sago Larvae                | Coleoptera  | converted to DRY | LARVAE       | 22.6 |     |      | Nirmala et al., 2017          |
| East and Southeast Asia       | <i>Rhynchophorus ferrugineus</i> | Asian Palm Weevil / Sago Larvae                | Coleoptera  | DRY              | LARVAE       | 34.1 |     | 9.0  | Ohtsuka et al., 1984          |
| East and Southeast Asia       | <i>Rhynchophorus ferrugineus</i> | Asian Palm Weevil / Sago Larvae                | Coleoptera  | DRY              | LARVAE       | 59.3 |     | 5.6  | Linn et al., 2016             |
| East and Southeast Asia       | <i>Rhynchophorus ferrugineus</i> | Asian Palm Weevil / Sago Larvae                | Coleoptera  | DRY              | LARVAE       | 30.5 |     | 9.9  | Abdel-Moniem et al., 2017     |
| East and Southeast Asia       | <i>Rhynchophorus ferrugineus</i> | Asian Palm Weevil / Sago Larvae                | Coleoptera  | DRY              | LARVAE       | 34.6 |     |      | Barroso et al., 2014          |
| East and Southeast Asia       | <i>Rhynchophorus ferrugineus</i> | Asian Palm Weevil / Sago Larvae                | Coleoptera  | DRY              | LARVAE       | 18.0 |     | 1.0  | Chinarak et al., 2020         |
| East and Southeast Asia       | <i>Rhynchophorus ferrugineus</i> | Asian Palm Weevil / Sago Larvae                | Coleoptera  | DRY              | LARVAE       | 28.5 |     | 1.1  | Chinarak et al., 2020         |
| East and Southeast Asia       | <i>Rhynchophorus ferrugineus</i> | Asian Palm Weevil / Sago Larvae                | Coleoptera  | DRY              | LARVAE       | 24.8 |     | 1.6  | Chinarak et al., 2020         |
| East and Southeast Asia       | <i>Rhynchophorus ferrugineus</i> | Asian Palm Weevil / Sago Larvae                | Coleoptera  | DRY              | PUPA         | 32.3 |     |      | Abdel-Moniem et al., 2017     |
| East and Southeast Asia       | <i>Gryllus bimaculatus</i>       | Two-Spotted Cricket / African Field Cricket    | Coleoptera  | converted to DRY | ADULT        | 45.1 |     | 33.2 | Yyoung-Aree et al., 1997      |
| East and Southeast Asia       | <i>Gryllus bimaculatus</i>       | Two-Spotted Cricket / African Field Cricket    | Orthoptera  | DRY              | ADULT        | 53.3 |     |      | Kovitvadhi et al., 2019       |
| East and Southeast Asia       | <i>Gryllus bimaculatus</i>       | Two-Spotted Cricket / African Field Cricket    | Orthoptera  | DRY              | LATE NYMPH   | 58.3 |     | 9.7  | Ghosh et al., 2017            |
| East and Southeast Asia       | <i>Gryllus bimaculatus</i>       | Two-Spotted Cricket / African Field Cricket    | Orthoptera  | DRY              | ADULT        | 60.7 |     | 7.2  | Udomsil et al., 2019          |
| East and Southeast Asia       | <i>Gryllus bimaculatus</i>       | Two-Spotted Cricket / African Field Cricket    | Orthoptera  | DRY              | ADULT        |      |     | 12.9 | Latunde-Dada et al., 2016     |
| East and Southeast Asia       | <i>Gryllus bimaculatus</i>       | Two-Spotted Cricket / African Field Cricket    | Orthoptera  | DRY              | ADULT        | 57.0 |     |      | Taufek et al., 2016           |
| East and Southeast Asia       | <i>Gryllus assimilis</i>         | 1 Black Field Cricket / Jamaican Field Cricket | Orthoptera  | DRY              | ADULT        |      |     |      | 2.88 Schmidt et al., 2019     |
| East and Southeast Asia       | <i>Acheta domesticus</i>         | House cricket                                  | Orthoptera  | DRY              | ADULT        | 73.1 |     |      | Barroso et al., 2014          |
| East and Southeast Asia       | <i>Acheta domesticus</i>         | House cricket                                  | Orthoptera  | DRY              | ADULT        | 52.8 |     |      | Kovitvadhi et al., 2019       |
| East and Southeast Asia       | <i>Acheta domesticus</i>         | House cricket                                  | Orthoptera  | converted to DRY | ADULT        | 60.0 |     | 6.4  | 70.20 Finke, 2015             |
| East and Southeast Asia       | <i>Acheta domesticus</i>         | House cricket                                  | Orthoptera  | DRY              | ADULT        | 66.6 |     | 6.3  | 487                           |
| East and Southeast Asia       | <i>Acheta domesticus</i>         | House cricket                                  | Orthoptera  | DRY              | NYMPH        | 67.2 |     | 9.3  | 633                           |
| Central and South Asia        | <i>Samia ricini</i>              | Eri Silkworm                                   | Lepidoptera | DRY              | PUPA         | 54.6 |     | 24.0 | Longvah et al., 2011          |
| Central and South Asia        | <i>Samia ricini</i>              | Eri Silkworm                                   | Lepidoptera | DRY              | PUPA         | 54.8 |     | 23.4 | Longvah et al., 2011          |
| Central and South Asia        | <i>Samia ricini</i>              | Eri Silkworm                                   | Lepidoptera | DRY              | PUPA         | 59.4 |     | 40.0 | Mazumdar, 2019                |
| Central and South Asia        | <i>Samia ricini</i>              | Eri Silkworm                                   | Lepidoptera | DRY              | PUPA         | 64.5 |     |      | Kovitvadhi et al., 2019       |
| Central and South Asia        | <i>Samia ricini</i>              | Eri Silkworm                                   | Lepidoptera | DRY              | PUPA         | 48.2 |     | 24.5 | Sailo, 2019                   |
| Central and South Asia        | <i>Oecophylla smaragdina</i>     | Weaver Ant                                     | Hymenoptera | converted to DRY | ADULT        | 53.5 |     | 21.9 | Yyoung-Aree et al., 1997      |
| Central and South Asia        | <i>Oecophylla smaragdina</i>     | Weaver Ant                                     | Hymenoptera | DRY              | ADULT        | 69.7 |     | 24.9 | Linn et al., 2016             |
| Central and South Asia        | <i>Oecophylla smaragdina</i>     | Weaver Ant                                     | Hymenoptera | DRY              | ADULT        | 55.3 |     | 15.7 | Chakravorty et al., 2016      |
| Central and South Asia        | <i>Oecophylla smaragdina</i>     | Weaver Ant                                     | Hymenoptera | DRY              | ADULT        | 45.2 |     | 15.3 | Sailo, 2019                   |
| Central and South Asia        | <i>Oecophylla smaragdina</i>     | Weaver Ant                                     | Hymenoptera | converted to DRY | EGG          | 38.7 |     | 22.7 | Yyoung-Aree et al., 1997      |
| Central and South Asia        | <i>Oecophylla smaragdina</i>     | Weaver Ant                                     | Hymenoptera | converted to DRY | YOUNG FEMALE | 37.5 |     | 10.0 | Yyoung-Aree et al., 1997      |
| Central and South Asia        | <i>Lepidiota mansueta</i>        | Scarab Beetle                                  | Coleoptera  | DRY              | ADULT        | 76.4 |     | 1.6  | Bhattacharyya et al., 2018    |
| Central and South Asia        | <i>Lepidiota mansueta</i>        | Scarab Beetle                                  | Coleoptera  | DRY              | ADULT        | 76.8 |     | 1.6  | Borah, 2016                   |
| North Africa and Western Asia | <i>Schistocerca gregaria</i>     | Desert Locust                                  | Orthoptera  | DRY              | ADULT        | 50.6 |     | 2.9  | Khalil, 2018                  |
| North Africa and Western Asia | <i>Schistocerca gregaria</i>     | Desert Locust                                  | Orthoptera  | DRY              | ADULT        | 76.0 |     | 8.4  | Zielińska et al., 2015        |
| North Africa and Western Asia | <i>Schistocerca gregaria</i>     | Desert Locust                                  | Orthoptera  | DRY              | ADULT        | 35.3 |     |      | Haber et al., 2019            |
| North Africa and Western Asia | <i>Schistocerca gregaria</i>     | Desert Locust                                  | Orthoptera  | DRY              | ADULT        | 46.3 |     | 4.8  | Kinyuru, 2020                 |
| North Africa and Western Asia | <i>Schistocerca sp.</i>          | 2 Grasshopper/Locust, Species Unspecified      | Orthoptera  | DRY              | ADULT        | 61.0 |     |      | Ramos-Elorduy et al., 1997    |
| North Africa and Western Asia | <i>Locusta migratoria</i>        | Migratory Locust                               | Orthoptera  | DRY              | ADULT        | 50.4 |     | 0.1  | Mohamed, 2015                 |
| North Africa and Western Asia | <i>Locusta migratoria</i>        | Migratory Locust                               | Orthoptera  | DRY              | ADULT        | 59.0 |     | 12.4 | Ooninx and van der Poel, 2010 |
| North Africa and Western Asia | <i>Locusta migratoria</i>        | Migratory Locust                               | Orthoptera  | DRY              | ADULT        |      |     |      | 0.84 Schmidt et al., 2019     |
| North Africa and Western Asia | <i>Locusta migratoria</i>        | Migratory Locust                               | Orthoptera  | DRY              | ADULT        | 50.8 |     |      | Clarkson et al., 2018         |
| North Africa and Western Asia | <i>Gryllus bimaculatus</i>       | Two-Spotted Cricket / African Field Cricket    | Coleoptera  | converted to DRY | ADULT        | 45.1 |     | 33.2 | Yyoung-Aree et al., 1997      |
| North Africa and Western Asia | <i>Gryllus sp.</i>               | Field Cricket, Species Unspecified             | Orthoptera  | DRY              | NYMPH        | 32.6 |     | 3.3  | Kuntadi et al., 2018          |
| North Africa and Western Asia | <i>Gryllus bimaculatus</i>       | Two-Spotted Cricket / African Field Cricket    | Orthoptera  | DRY              | ADULT        | 53.3 |     |      | Kovitvadhi et al., 2019       |
| North Africa and Western Asia | <i>Gryllus bimaculatus</i>       | Two-Spotted Cricket / African Field Cricket    | Orthoptera  | DRY              | LATE NYMPH   | 58.3 |     | 9.7  | Ghosh et al., 2017            |
| North Africa and Western Asia | <i>Gryllus bimaculatus</i>       | Two-Spotted Cricket / African Field Cricket    | Orthoptera  | DRY              | ADULT        | 60.7 |     | 7.2  | Udomsil et al., 2019          |
| North Africa and Western Asia | <i>Gryllus bimaculatus</i>       | Two-Spotted Cricket / African Field Cricket    | Orthoptera  | DRY              | ADULT        |      |     | 12.9 | Latunde-Dada et al., 2016     |
| North Africa and Western Asia | <i>Gryllus bimaculatus</i>       | Two-Spotted Cricket / African Field Cricket    | Orthoptera  | DRY              | ADULT        | 57.0 |     |      | Taufek et al., 2016           |
| North Africa and Western Asia | <i>Gryllus assimilis</i>         | 1 Black Field Cricket / Jamaican Field Cricket | Orthoptera  | DRY              | ADULT        |      |     |      | 2.88 Schmidt et al., 2019     |

1 Species were added only to supplement missing nutrient data for related insects in this region. For example, vitamin B12 values for *Gryllus bimaculatus* are not available, so vitamin B12 from *Gryllus assimilis* was added in North Africa and Western Asia.

2 Species added to give additional data to a similar species where data was sparse. For example, *Schistocerca sp.* was added where there was limited data for *Schistocerca gregaria*.

**Table S2**

| Paired code | Species                        | Common Name         | Nutrient | Value | Unit       | Reference                    |
|-------------|--------------------------------|---------------------|----------|-------|------------|------------------------------|
| a           | <i>Rhynchophorus phoenicis</i> | African Palm Weevil | zinc     | 26.5  | mg/100g DM | Tang et al., 2019            |
| a           | <i>Rhynchophorus phoenicis</i> | African Palm Weevil | zinc     | 0.0   | mg/100g DM | Omotoso and Adedire, 2007    |
| a           | <i>Rhynchophorus phoenicis</i> | African Palm Weevil | zinc     | 16.3  | mg/100g DM | Ehounou et al., 2019         |
| a           | <i>Rhynchophorus phoenicis</i> | African Palm Weevil | zinc     | 15.8  | mg/100g DM | Elemo et al., 2011           |
| a           | <i>Rhynchophorus phoenicis</i> | African Palm Weevil | zinc     | 23.7  | mg/100g DM | Santos Oliveira et al., 1976 |
| a           | <i>Rhynchophorus phoenicis</i> | African Palm Weevil | zinc     | 0.5   | mg/100g DM | Okunowo et al., 2017         |
| a           | <i>Rhynchophorus phoenicis</i> | African Palm Weevil | zinc     | 3.6   | mg/100g DM | Parker et al., 2020          |
| a           | <i>Rhynchophorus phoenicis</i> | African Palm Weevil | zinc     | 4.5   | mg/100g DM | Omotoso and Adesola, 2018    |
| b           | <i>Gryllus bimaculatus</i>     | Field Cricket       | zinc     | 22.4  | mg/100g DM | Ghosh et al., 2017           |
| b           | <i>Gryllus bimaculatus</i>     | Field Cricket       | zinc     | 14.4  | mg/100g DM | Udomsil et al., 2019         |
| b           | <i>Gryllus bimaculatus</i>     | Field Cricket       | zinc     | 32.1  | mg/100g DM | Latunde-Dada et al., 2016    |
| c           | <i>Cirina forda</i>            | Emperor Shea Moth   | zinc     | 3.8   | mg/100g DM | Omotoso, 2006                |
| c           | <i>Cirina forda</i>            | Emperor Shea Moth   | zinc     | 15.0  | mg/100g DM | Nigeria Food Database, 2019  |
| c           | <i>Cirina forda</i>            | Emperor Shea Moth   | zinc     | 8.6   | mg/100g DM | Akinnawo and Ketiku, 2000    |
| c           | <i>Cirina forda</i>            | Emperor Shea Moth   | zinc     | 24.2  | mg/100g DM | Osasona and Olaofe, 2010     |
| c           | <i>Cirina forda</i>            | Emperor Shea Moth   | zinc     | 15.0  | mg/100g DM | Adepoju and Daboh, 2013      |
| c           | <i>Cirina forda</i>            | Emperor Shea Moth   | zinc     | 38.7  | mg/100g DM | Igbabul et al., 2015         |
| c           | <i>Cirina forda</i>            | Emperor Shea Moth   | zinc     | 3.9   | mg/100g DM | Omotoso and Adesola, 2018    |
| d           | <i>Samia ricini</i>            | Eri Silkworm        | zinc     | 7.2   | mg/100g DM | Longvah et al., 2011         |
| d           | <i>Samia ricini</i>            | Eri Silkworm        | zinc     | 7.0   | mg/100g DM | Longvah et al., 2011         |
| d           | <i>Samia ricini</i>            | Eri Silkworm        | zinc     | 7.7   | mg/100g DM | Sailo, 2019                  |
| e           | <i>Oecophylla smaragdina</i>   | Weaver Ant          | zinc     | 19.0  | mg/100g DM | Chakravorty et al., 2016     |
| e           | <i>Oecophylla smaragdina</i>   | Weaver Ant          | zinc     | 18.4  | mg/100g DM | Sailo, 2019                  |
| a           | <i>Rhynchophorus phoenicis</i> | African Palm Weevil | phytate  | 0.0   | mg/100g DM | Ekop et al., 2010            |
| a           | <i>Rhynchophorus phoenicis</i> | African Palm Weevil | phytate  | 19.4  | mg/100g DM | Omotoso and Adesola, 2018    |
| a           | <i>Rhynchophorus phoenicis</i> | African Palm Weevil | phytate  | 0.3   | mg/100g DM | Jonathan, 2012               |
| b           | <i>Gryllus assimilis</i>       | Cricket             | phytate  | 0.1   | mg/100g DM | Oibiokpa et al., 2017        |
| b           | <i>Gymnogryllus lucens</i>     | Cricket             | phytate  | 0.0   | mg/100g DM | Ekop et al., 2010            |
| c           | <i>Cirina forda</i>            | Emperor Shea Moth   | phytate  | 1.0   | mg/100g DM | Omotoso, 2006                |
| c           | <i>Cirina forda</i>            | Emperor Shea Moth   | phytate  | 25.5  | mg/100g DM | Omotoso and Adesola, 2018    |
| c           | <i>Cirina forda</i>            | Emperor Shea Moth   | phytate  | 0.1   | mg/100g DM | Oibiokpa et al., 2017        |
| d           | <i>Samia ricini</i>            | Eri Silkworm        | phytate  | 97.9  | mg/100g DM | Sailo, 2019                  |
| e           | <i>Oecophylla smaragdina</i>   | Weaver Ant          | phytate  | 171.0 | mg/100g DM | Chakravorty et al., 2016     |
| e           | <i>Oecophylla smaragdina</i>   | Weaver Ant          | phytate  | 19.7  | mg/100g DM | Sailo, 2019                  |

**Table S3**

| Age group                        | Gender | Country  | Study                              | Study Year | Sample size | Mean vitamin |         |       | Citation                  |
|----------------------------------|--------|----------|------------------------------------|------------|-------------|--------------|---------|-------|---------------------------|
|                                  |        |          |                                    |            |             | B12 intake   | SD      | CV    |                           |
| Adults (age 19-64 years)         | Male   | Germany  | German National Nutrition Study II | 2005–2007  | 4912        | 6.6          | 3.7     | 56.1  | Roman Viñas et al., 2011  |
| Adults (age 19-64 years)         | Male   | Spain    | ENCAT                              | 2002–2003  | 706         | 5            | 1       | 20.0  | Roman Viñas et al., 2011  |
| Adults (age 19-64 years)         | Male   | Finland  | National FINDIET Survey            | 2007       | 730         | 6.6          | 6.5     | 98.5  | Roman Viñas et al., 2011  |
| Adults (age 19-64 years)         | Male   | Greece   | Greek EPIC study                   | 1994–1999  | 500         | 5.3          | 11.4    | 215.1 | Roman Viñas et al., 2011  |
| Adults (age 19-64 years)         | Male   | Ireland  | SLAN                               | 2007       | 662         | 5.4          | 3.7     | 68.5  | Roman Viñas et al., 2011  |
| Adults (age 19-64 years)         | Male   | Portugal | EPI Porto study                    | 1999–2003  | 917         | 9.3          | 4.1     | 44.1  | Roman Viñas et al., 2011  |
| Elderly (age >64 years)          | Male   | Germany  | German National Nutrition Study II | 2005–2007  | 1469        | 5.9          | 2.5     | 42.4  | Roman Viñas et al., 2011  |
| Elderly (age >64 years)          | Male   | Spain    | ENCAT                              | 2002–2003  | 163         | 3.8          | 0.6     | 15.8  | Roman Viñas et al., 2011  |
| Elderly (age >64 years)          | Male   | Finland  | National FINDIET Survey            | 2007       | 229         | 6.5          | 6       | 92.3  | Roman Viñas et al., 2011  |
| Elderly (age >64 years)          | Male   | Portugal | EPI Porto study                    | 1999–2003  | 246         | 8.2          | 3.8     | 46.3  | Roman Viñas et al., 2011  |
| Adults (age 19-64 years)         | Female | Germany  | German National Nutrition Study II | 2005–2007  | 6016        | 4.4          | 2.1     | 47.7  | Roman Viñas et al., 2011  |
| Adults (age 19-64 years)         | Female | Spain    | ENCAT                              | 2002–2003  | 875         | 4            | 0.8     | 20.0  | Roman Viñas et al., 2011  |
| Adults (age 19-64 years)         | Female | Finland  | National FINDIET Survey            | 2007       | 846         | 4.3          | 3.4     | 79.1  | Roman Viñas et al., 2011  |
| Adults (age 19-64 years)         | Female | Greece   | Greek EPIC study                   | 1994–1999  | 451         | 3.8          | 9.7     | 255.3 | Roman Viñas et al., 2011  |
| Adults (age 19-64 years)         | Female | Ireland  | SLAN                               | 2007       | 717         | 4.1          | 3.6     | 87.8  | Roman Viñas et al., 2011  |
| Adults (age 19-64 years)         | Female | Portugal | EPI Porto study                    | 1999–2003  | 1472        | 8.8          | 4       | 45.5  | Roman Viñas et al., 2011  |
| Elderly (age >64 years)          | Female | Germany  | German National Nutrition Study II | 2005–2007  | 1562        | 4.3          | 2       | 46.5  | Roman Viñas et al., 2011  |
| Elderly (age >64 years)          | Female | Spain    | ENCAT                              | 2002–2003  | 179         | 3.5          | 0.5     | 14.3  | Roman Viñas et al., 2011  |
| Elderly (age >64 years)          | Female | Finland  | National FINDIET Survey            | 2007       | 234         | 5.2          | 4.8     | 92.3  | Roman Viñas et al., 2011  |
| Elderly (age >64 years)          | Female | Portugal | EPI Porto study                    | 1999–2003  | 339         | 7.5          | 4.1     | 54.7  | Roman Viñas et al., 2011  |
| Children (age 4-8)               | Both   | Zambia   |                                    | 2012–2013  | 202         |              |         | 21.5  | Caswell et al., 2020      |
| Adolescents (age 12-19)          | Male   | Brazil   | Health Survey of São Paulo         | 2007–2008  | 140         | 5.6          | 5.9204  | 105.7 | Verly Junior et al., 2010 |
| Adolescents (age 12-19)          | Female | Brazil   | Health Survey of São Paulo         | 2007–2008  | 133         | 4.7          | 2.62504 | 55.9  | Verly Junior et al., 2010 |
| Pregnant women (age 14-51 years) | Female | Malawi   |                                    | 1988–1991  | 184         |              |         | 81.0  | Nyambose et al., 2002     |
| <b>MEDIAN</b>                    |        |          |                                    |            |             |              |         |       | <b>55.3</b>               |

| <b>TABLE S4</b>                                              |      |                         |                                     |                                |                                       |                                                        |                                                                         |
|--------------------------------------------------------------|------|-------------------------|-------------------------------------|--------------------------------|---------------------------------------|--------------------------------------------------------|-------------------------------------------------------------------------|
| <b>Full results by individual region: Sub-Saharan Africa</b> |      |                         |                                     |                                |                                       |                                                        |                                                                         |
| Nutrient                                                     | Unit | Per capita daily supply | Estimated average requirement (EAR) | Current rate of deficiency (%) | Amount supplied by 5 grams of insects | Absolute change in rate of deficiency with insects (%) | 2020 population removed from risk of deficiency with insects (millions) |
| Protein                                                      | g    | 52.0 (50.8 – 53.3)      | 26.5                                | 17.5 (16.5 – 18.5)             | 2.6 (1.0 – 3.8)                       | -1.6 (-2.1 – -0.4)                                     | 15 (3 – 19)                                                             |
| Zinc (absorbable)                                            | mg   | 2.33 (2.30 – 2.36)      | 1.76                                | 27.2 (26.2 – 28.0)             | 0.10 (0.07 – 0.13)                    | -3.6 (-4.9 – -2.6)                                     | 33 (23 – 44)                                                            |
| Folate                                                       | mcg  | 414 (384 – 475)         | 281                                 | 25.8 (18.8 – 30.7)             | 18 (9 – 45)                           | -3.0 (-7.9 – -1.4)                                     | 27 (12 – 70)                                                            |
| Vitamin B12                                                  | mcg  | 2.61 (1.30 – 4.08)      | 1.72                                | 45.2 (24.4 – 76.1)             | 0.14 (0 – 3.51)                       | -3.9 (-58.2 – -0.8)                                    | 35 (7 – 523)                                                            |
| Iron                                                         | mg   | 25.2 (21.4 – 28.6)      | *                                   | *                              | 0.48 (0.01 – 3.2)                     | *                                                      | *                                                                       |

| <b>TABLE S5</b>                                                  |      |                         |                                     |                                |                                       |                                                        |                                                                         |
|------------------------------------------------------------------|------|-------------------------|-------------------------------------|--------------------------------|---------------------------------------|--------------------------------------------------------|-------------------------------------------------------------------------|
| <b>Full results by individual region: Central and South Asia</b> |      |                         |                                     |                                |                                       |                                                        |                                                                         |
| Nutrient                                                         | Unit | Per capita daily supply | Estimated average requirement (EAR) | Current rate of deficiency (%) | Amount supplied by 5 grams of insects | Absolute change in rate of deficiency with insects (%) | 2020 population removed from risk of deficiency with insects (millions) |
| Protein                                                          | g    | 55.5 (53.8 – 57.1)      | 27.1                                | 9.3 (8.1 – 10.6)               | 2.7 (1.9 – 3.8)                       | -1.4 (-2.0 – -0.9)                                     | 28 (18 – 40)                                                            |
| Zinc (absorbable)                                                | mg   | 2.49 (2.46 – 2.54)      | 1.95                                | 27.9 (26.4 – 29.1)             | 0.1 (0.07 – 0.13)                     | -3.3 (-4.5 – -2.4)                                     | 67 (48 – 90)                                                            |
| Folate                                                           | mcg  | 303 (287 – 320)         | 295                                 | 48.6 (43.1 – 54.3)             | 19 (9 – 45)                           | -5.9 (-13.6 – -2.9)                                    | 118 (58 – 269)                                                          |
| Vitamin B12                                                      | mcg  | 1.42 (1.16 – 1.74)      | 1.82                                | 76.6 (66.5 – 84.3)             | 0.14 (0 – 3.51)                       | -4.4 (-74.8 – 0)                                       | 85 (0 – 1461)                                                           |
| Iron                                                             | mg   | 21.5 (18.1 – 30.2)      | *                                   | *                              | 1.1 (0.08 – 2)                        | *                                                      | *                                                                       |

| <b>TABLE S6</b>                                                   |      |                         |                                     |                                |                                       |                                                        |                                                                         |
|-------------------------------------------------------------------|------|-------------------------|-------------------------------------|--------------------------------|---------------------------------------|--------------------------------------------------------|-------------------------------------------------------------------------|
| <b>Full results by individual region: East and Southeast Asia</b> |      |                         |                                     |                                |                                       |                                                        |                                                                         |
| Nutrient                                                          | Unit | Per capita daily supply | Estimated average requirement (EAR) | Current rate of deficiency (%) | Amount supplied by 5 grams of insects | Absolute change in rate of deficiency with insects (%) | 2020 population removed from risk of deficiency with insects (millions) |
| Protein                                                           | g    | 69 (66.2 – 74.5)        | 29.3                                | 10.8 (8.7 – 12.2)              | 2.7 (1.1 – 3.7)                       | -1.1 (-1.5 – -0.5)                                     | 23 (10 – 31)                                                            |
| Zinc (absorbable)                                                 | mg   | 2.92 (2.84 – 3.01)      | 2.06                                | 19.3 (17.7 – 21.1)             | 0.1 (0.07 – 0.13)                     | -2.5 (-3.3 – -1.8)                                     | 54 (39 – 71)                                                            |

|             |     |                    |      |                    |                    |                    |               |
|-------------|-----|--------------------|------|--------------------|--------------------|--------------------|---------------|
| Folate      | mcg | 406 (350 – 629)    | 302  | 29.9 (22.2 – 38.9) | 21 (9 – 32)        | -3.5 (-6.5 – -1.3) | 74 (27 – 138) |
| Vitamin B12 | mcg | 4.31 (2.67 – 6.12) | 1.88 | 17.4 (5.2 – 37.7)  | 0.05 (0 – 3.51)    | -0.6 (-23 – 0)     | 13 (0 – 492)  |
| Iron        | mg  | 26.6 (21.6 – 45.8) | *    | *                  | 0.32 (0.05 – 1.66) | *                  | *             |

**TABLE S7**

**Full results by individual region: Northern Africa and Western Asia**

| Nutrient          | Unit | Per capita daily supply | Estimated average requirement (EAR) | Current rate of deficiency (%) | Amount supplied by 5 grams of insects | Absolute change in rate of deficiency with insects (%) | 2020 population removed from risk of deficiency with insects (millions) |
|-------------------|------|-------------------------|-------------------------------------|--------------------------------|---------------------------------------|--------------------------------------------------------|-------------------------------------------------------------------------|
| Protein           | g    | 77.8 (75.5 – 79.6)      | 28.4                                | 4.6 (4.1 – 5.2)                | 2.7 (1.6 – 3.8)                       | -0.6 (-0.8 – -0.3)                                     | 2 (1 – 3)                                                               |
| Zinc (absorbable) | mg   | 2.58 (2.56 – 2.6)       | 1.92                                | 25.1 (24.3 – 25.9)             | 0.08 (0.06 – 0.1)                     | -2.4 (-3.2 – -1.7)                                     | 10 (7 – 14)                                                             |
| Folate            | mcg  | 425 (409 – 447)         | 291                                 | 22.9 (20.4 – 25.4)             | 19 (9 – 45)                           | -3.1 (-6.8 – -1.5)                                     | 13 (7 – 30)                                                             |
| Vitamin B12       | mcg  | 2.89 (1.88 – 4.62)      | 1.8                                 | 36.1 (16.9 – 60.6)             | 0.14 (0 – 3.51)                       | -2.4 (-46.9 – 0)                                       | 10 (0 – 203)                                                            |
| Iron              | mg   | 21 (19.3 – 22.9)        | *                                   | *                              | 0.36 (0 – 1.66)                       | *                                                      | *                                                                       |

## Supplemental Methods and References

### 1. Methods

#### *1.1. Nutritional intakes and possible additional contributions from insects*

For all nutrients except vitamin B12, we used the existing publicly accessible Global Expanded Nutrient Supply (GENuS) dataset, which reports the contribution of 225 foods to 23 macro- and micronutrients for 34 age-sex groups (5-year age bins by sex) across 152 countries (95.5% of the global population) through 2011 (1,2). We used 2011 for this analysis, the most recent year in GENuS. GENuS relies on data from the Food and Agriculture Organization of the United Nation's (FAO) food balance sheets combined with additional FAO data on commodity production and trade paired with regional food composition tables to estimate the range of potential nutrients supplied by the diet. Though FAO and GENuS only report food available to be eaten rather than food actually eaten, here we use GENuS nutrient supply estimates as a proxy for nutrient intake, as in many previous studies (3–6).

For protein, we applied an additional coefficient to account for its varying digestibility depending on the food source. Here, we assumed that plant-based protein was 80% digestible and animal-based protein was 95% digestible (7). For insects, we relied on a handful of studies that have examined digestibility specifically, which showed some variation by species. Compared with soy protein, for example, some insects are of equivalent or superior protein quality (8,9). In a large study, insect protein digestibility for 87 species ranged from 76-96%, higher than that of most plant proteins but slightly lower than egg protein (95%) or beef (98%) (10). Another study measured protein digestibility of farmed *T. molitor* and *A. domesticus* fed to rats. Digestibility for both raw (84-92%) and heat-treated insects (84-90%) was high (11). Among these variable estimates, we used 85% as an average value.

Lastly, converting the amount of total dietary zinc to that which is absorbable by the body requires another step. For this, we used the total zinc and phytate in the diet, with and without insects, as inputs into an equation for estimating absorbable zinc derived by Miller et al. (12) with updated coefficients from Hambidge et al. (13). Because zinc and phytate are thus paired in our dietary absorbable zinc calculations, for this step we winnowed our list of insect nutritional data to only those species that had data for both zinc and phytate. This left only five species with the necessary paired data, which was then insufficient to elucidate differences among regions. Therefore, for zinc only, we used a single global food composition table which combined the possible contributions from only those five species with appropriate data, which we then applied to all study countries (Supplemental Table S2).

#### *1.2. Estimating human nutritional requirements*

For absorbable zinc, the physiological requirements for each age-sex group were estimated by the International Zinc Nutrition Consultative Group (14). Because pregnant and lactating women require extra zinc, we account for these additional requirements within the relevant age-sex groups by using the 2015 age-specific fertility rates in each country provided by the United

Nations Population Division (15) multiplied by the average fraction of the year occupied by pregnancy: 40/52 weeks. To estimate the number of lactating women in each country, fertility rates were multiplied by the average duration of breastfeeding collected from the World Health Organization (WHO) Global Data Bank on Infant and Young Child Feeding (16) and the World Breastfeeding Trends Initiative (17). Countries lacking data from either source were estimated using a regional average.

To estimate protein requirements, we used the method previously employed in Smith and Myers (6). Protein requirements are not derived solely as a function of an individual's age and sex, but also their weight (18). However, lacking a global standard for an acceptable weight from which to determine protein deficiency, we used the WHO recommendation of a body mass index (BMI) of 18.5 as the lowest acceptable weight-for-height before being deemed underweight. NCD-RisC (19) data on adult height by age, sex and country was used to calculate corresponding minimal acceptable weights in each group, and WHO BMI-for-age and height-for-age curves were used to extrapolate adult BMIs and heights to equivalent values for adolescents and children older than 5. For children under 5, BMI data was unavailable, so the fiftieth percentile weight was used in each country to determine deficiency. For pregnant and lactating women, additional protein requirements were estimated as for zinc.

For folate and vitamin B12, the recommended nutrient intake values for each age-sex group were collected from FAO-WHO (20) and converted to estimated average requirements (EARs) using conversion factors from WHO-FAO (21) for use in the next step. When the reported age-sex categories for the physiological requirements did not align with the 5-year age bins in our model, we used simple weighted averages of the requirements to harmonize our definitions.

For iron, the link between dietary intake and physiological iron deficiency is complicated by several interceding variables (22,23): the relative amounts of non-heme and heme iron consumed, the individual's iron status at the time, other dietary components eaten simultaneously that can inhibit (e.g., calcium, phytate, alcohol, tannins) or enhance (e.g., ascorbic acid, animal protein) absorption, menstruation in women of childbearing age, and concurrent diseases. Because we have sufficient data for only some of these factors, we have an incomplete picture of the bioavailability of iron for any individual or population. Furthermore, the iron requirements for menstruating women are not normally distributed, which violates the conditions for using the EAR cut-point method in the next step. Due to these limitations, we are unable to estimate the prevalence of those at risk of deficiency either before or after addition of insects. Instead, we model only the amount of additional iron that could be provided by insects in each region to give a rough idea of the potential importance to increasing iron sufficiency.

## References for Supplemental Methods

1. Smith M. Nutrient Totals by Age and Sex (2011) [Internet]. Harvard Dataverse; 2018 [cited 2020 Oct 9]. Available from: <https://dataverse.harvard.edu/dataset.xhtml?persistentId=doi:10.7910/DVN/XIKNDC>



2. Smith MR, Micha R, Golden CD, Mozaffarian D, Myers SS. Global Expanded Nutrient Supply (GENUS) Model: A New Method for Estimating the Global Dietary Supply of Nutrients. *PLOS ONE*. 2016 Jan 25;11(1):e0146976.
3. Wessells KR, Brown KH. Estimating the global prevalence of zinc deficiency: results based on zinc availability in national food supplies and the prevalence of stunting. *PloS One*. 2012;7(11):e50568.
4. Medek DE, Schwartz J, Myers SS. Estimated Effects of Future Atmospheric CO<sub>2</sub> Concentrations on Protein Intake and the Risk of Protein Deficiency by Country and Region. *Environmental Health Perspectives*. 2017 02;125(8):087002.
5. Beal T, Massiot E, Arsenault JE, Smith MR, Hijmans RJ. Global trends in dietary micronutrient supplies and estimated prevalence of inadequate intakes. *PLOS ONE*. 2017 Apr 11;12(4):e0175554.
6. Smith MR, Myers SS. Impact of anthropogenic CO<sub>2</sub> emissions on global human nutrition. *Nature Climate Change*. 2018 Sep;8(9):834–9.
7. Millward DJ, Jackson AA. Protein/energy ratios of current diets in developed and developing countries compared with a safe protein/energy ratio: implications for recommended protein and amino acid intakes. *Public Health Nutrition*. 2004 May;7(3):387–405.
8. Finke MD, DeFoliart GR, Benevenga NJ. Use of a four-parameter logistic model to evaluate the quality of the protein from three insect species when fed to rats. *J Nutr*. 1989 Jun;119(6):864–71.
9. Yi L, Lakemond CMM, Sagis LMC, Eisner-Schadler V, van Huis A, van Boekel MAJS. Extraction and characterisation of protein fractions from five insect species. *Food Chem*. 2013 Dec 15;141(4):3341–8.
10. Ramos-Elorduy J, Moreno JMP, Prado EE, Perez MA, Otero JL, de Guevara OL. Nutritional Value of Edible Insects from the State of Oaxaca, Mexico. *Journal of Food Composition and Analysis*. 1997 Jun;10(2):142–57.
11. Poelaert C, Francis F, Alabi T, Megido RC, Crahay B, Bindelle J, et al. Protein value of two insects, subjected to various heat treatments, using growing rats and the protein digestibility-corrected amino acid score. *Journal of Insects as Food and Feed*. 2018 May 29;4(2):77–87.
12. Miller LV, Krebs NF, Hambidge KM. A mathematical model of zinc absorption in humans as a function of dietary zinc and phytate. *The Journal of Nutrition*. 2007 Jan;137(1):135–41.
13. Hambidge KM, Miller LV, Westcott JE, Sheng X, Krebs NF. Zinc bioavailability and homeostasis. *The American Journal of Clinical Nutrition*. 2010 May;91(5):1478S-1483S.

14. International Zinc Nutrition Consultative Group (IZiNCG), Brown KH, Rivera JA, Bhutta Z, Gibson RS, King JC, et al. International Zinc Nutrition Consultative Group (IZiNCG) technical document #1. Assessment of the risk of zinc deficiency in populations and options for its control. *Food and Nutrition Bulletin*. 2004 Mar;25(1 Suppl 2):S99-203.
15. United Nations DESA Population Division. World Population Prospects (WPP) [Internet]. 2017 [cited 2020 Oct 9]. Available from: <https://population.un.org/wpp/>
16. World Health Organization (WHO). WHO Global Data Bank on Infant and Young Child Feeding [Internet]. World Health Organization; [cited 2020 Oct 9]. Available from: <https://www.who.int/nutrition/databases/infantfeeding/en/>
17. WBTi Country Reports [Internet]. [cited 2020 Oct 9]. Available from: <https://www.worldbreastfeedingtrends.org/wbti-country-report.php>
18. Joint FAO/WHO/UNU Expert Consultation on Protein and Amino Acid Requirements in Human Nutrition (2002 : Geneva S, Nations F and AO of the U, Organization WH, University UN. Protein and amino acid requirements in human nutrition : report of a joint FAO/WHO/UNU expert consultation [Internet]. World Health Organization; 2007 [cited 2020 Oct 8]. Available from: <https://apps.who.int/iris/handle/10665/43411>
19. NCD Risk Factor Collaboration (NCD-RisC). A century of trends in adult human height. Franco E, editor. *eLife*. 2016 Jul 26;5:e13410.
20. World Health Organization, Food and Agriculture Organization of the United Nations, editors. Vitamin and mineral requirements in human nutrition. 2nd ed. Geneva : Rome: World Health Organization ; FAO; 2004. 341 p.
21. Allen L. Guidelines on food fortification with micronutrients. Geneva: World Health Organization [u.a.]; 2006.
22. Hallberg L, Hulthén L. Prediction of dietary iron absorption: an algorithm for calculating absorption and bioavailability of dietary iron. *The American Journal of Clinical Nutrition*. 2000 May;71(5):1147–60.
23. Zimmermann MB, Hurrell RF. Nutritional iron deficiency. *Lancet (London, England)*. 2007 Aug 11;370(9586):511–20.

## References for Supplemental Tables

- Abdel-Moniem, A. S. H., El-Kholy, M. Y., & Elshekh, W. E. A. (2017). The Red Palm Weevil, *Rhynchophorus ferrugineus* Olivier, as Edible Insects for Food and Feed a Case Study in Egypt. *Research Journal of Pharmaceutical Biological and Chemical Sciences*.
- Adepoju, O. T., & Daboh, O. O. (2013). Nutrient Composition of *Cirina forda* (Westwood)-Enriched Complementary Foods. *Annals of Nutrition and Metabolism*, 63(1–2), 139–144. <https://doi.org/10.1159/000353885>
- Akinawo, O., & Ketiku, A. O. (2000). Chemical composition and fatty acid profile of edible larva of *Cirina forda* (Westwood). *African Journal of Biomedical Research*, 3(2), 93–96. <https://doi.org/10.4314/ajbr.v3i2>.
- Alves, A. V., Sanjinez-Argandoña, E. J., Linzmeier, A. M., Cardoso, C. A. L., & Macedo, M. L. R. (2016). Food Value of Mealworm Grown on *Acrocomia aculeata* Pulp Flour. *PLOS ONE*, 11(3), e0151275. <https://doi.org/10.1371/journal.pone.0151275>
- Banjo, A. D., Lawal, O. A., & Songonuga, E. A. (2006). The nutritional value of fourteen species of edible insects in southwestern Nigeria. *African Journal of Biotechnology*, 5(3), 298–301. <https://doi.org/10.4314/ajb.v5i3>.
- Barroso, F. G., de Haro, C., Sánchez-Muros, M.-J., Venegas, E., Martínez-Sánchez, A., & Pérez-Bañón, C. (2014). The potential of various insect species for use as food for fish. *Aquaculture*, 422–423, 193–201. <https://doi.org/10.1016/j.aquaculture.2013.12.024>
- Bhattacharyya, B., Choudhury, B., Das, P., Dutta, S. K., Bhagawati, S., & Pathak, K. (2018). Nutritional Composition of Five Soil-Dwelling Scarab Beetles (Coleoptera: Scarabaeidae) of Assam, India. *The Coleopterists Bulletin*, 72(2), 339–346. <https://doi.org/10.1649/0010-065X-72.2.339>
- Borah, A. (2016, August 10). The Majuli beetle turns from pest to delicacy. *India Climate Dialogue*. <https://indiaclimatedialogue.net/2016/08/10/majuli-beetle-turns-pest-delicacy/>
- Caswell, B. L., Talegawkar, S. A., Siamusantu, W., West, K. P., & Palmer, A. C. (2020). Within-person, between-person and seasonal variance in nutrient intakes among 4- to 8-year-old rural Zambian children. *The British Journal of Nutrition*, 123(12), 1426–1433. <https://doi.org/10.1017/S0007114520000732>
- Chakravorty, J., Ghosh, S., Jung, C., & Meyer-Rochow, V. B. (2014). Nutritional composition of *Chondacris rosea* and *Brachytrupes orientalis*: Two common insects used as food by tribes of Arunachal Pradesh, India. *Journal of Asia-Pacific Entomology*, 17(3), 407–415. <https://doi.org/10.1016/j.aspen.2014.03.007>
- Chakravorty, J., Ghosh, S., Megu, K., Jung, C., & Meyer-Rochow, V. B. (2016). Nutritional and anti-nutritional composition of *Oecophylla smaragdina* (Hymenoptera: Formicidae) and *Odontotermes* sp. (Isoptera: Termitidae): Two preferred edible insects of Arunachal Pradesh, India. *Journal of Asia-Pacific Entomology*, 19(3), 711–720. <https://doi.org/10.1016/j.aspen.2016.07.001>
- Chieco, C., Morrone, L., Bertazza, G., Cappellozza, S., Saviane, A., Gai, F., Di Virgilio, N., & Rossi, F. (2019). The Effect of Strain and Rearing Medium on the Chemical Composition, Fatty Acid Profile and Carotenoid Content in Silkworm (*Bombyx mori*) Pupae. *Animals*, 9(3), 103. <https://doi.org/10.3390/ani9030103>
- Chinarak, K., Chaijan, M., & Panpipat, W. (2020). Farm-raised sago palm weevil (*Rhynchophorus ferrugineus*) larvae: Potential and challenges for promising source of nutrients. *Journal of Food Composition and Analysis*, 92, 103542. <https://doi.org/10.1016/j.jfca.2020.103542>

- Clarkson, C., Miroso, M., & Birch, J. (2018). Potential of Extracted *Locusta Migratoria* Protein Fractions as Value-Added Ingredients. *Insects*, 9(1), 20. <https://doi.org/10.3390/insects9010020>
- Dierenfeld, E. S. (2002). *Some preliminary observations on herbivorous insect composition: Nutrient advantages from a green leaf diet?* Symposium of the Comparative Nutrition Society, Antwerp, Belgium.
- Dignan, C., Burlingame, B., Kumar, S., & Aalbersberg, W. (2004). The Pacific Islands food composition tables. *The Pacific Islands Food Composition Tables., Ed.2.* <https://www.cabdirect.org/cabdirect/abstract/20043191618>
- Dreyer, J. J., & Wehmeyer, A. S. (1982). *Nutritive value of Mopanie worms.* <https://researchspace.csir.co.za/dspace/handle/10204/2349>
- Ehounou, G. P., Ouali-N'goran, S.-W. M., Soro, D., & Bedikou, M. E. (2019). Nutrient contributions of *Rhynchophorus phoenicis* Fabricius, 1801 (Coleoptera: Curculionidae), very appreciated larvae in Côte d'Ivoire compared with beef (N'Dama breed) and thon (*Thunnus thynnus*). *International Journal of Biological and Chemical Sciences*, 13(4), 2092–2103. <https://doi.org/10.4314/ijbcs.v13i4.16>
- Ekop, E. A., Udoh, A. I., & Akpan, P. E. (2010). Proximate and anti-nutrient composition of four edible insects in Akwa Ibom State, Nigeria. *World Journal of Applied Science and Technology*, 2(2), 224–231.
- Elemo, B. O., Elemo, G. N., Makinde, M. A., & Erukainure, O. L. (2011). Chemical evaluation of African palm weevil, *Rhynchophorus phoenicis*, larvae as a food source. *Journal of Insect Science*, 11(1). <https://doi.org/10.1673/031.011.14601>
- Finke, M. D. (2002). Complete nutrient composition of commercially raised invertebrates used as food for insectivores. *Zoo Biology*, 21(3), 269–285. <https://doi.org/10.1002/zoo.10031>
- Finke, M. D. (2007). Estimate of chitin in raw whole insects. *Zoo Biology*, 26(2), 105–115. <https://doi.org/10.1002/zoo.20123>
- Finke, M. D. (2015). Complete nutrient content of four species of commercially available feeder insects fed enhanced diets during growth. *Zoo Biology*, 34(6), 554–564. <https://doi.org/10.1002/zoo.21246>
- Fombong, F. T., Van Der Borght, M., & Vanden Broeck, J. (2017). Influence of Freeze-Drying and Oven-Drying Post Blanching on the Nutrient Composition of the Edible Insect *Ruspolia differens*. *Insects*, 8(3). <https://doi.org/10.3390/insects8030102>
- Frye, F. L., & Calvert, C. C. (1989). Preliminary Information on the Nutritional Content of Mulberry Silk Moth (*Bombyx mori*) Larvae. *Journal of Zoo and Wildlife Medicine*, 20(1), 73–75.
- Ghaly, A. E., & Alkoaik, F. N. (2009). The yellow mealworm as a novel source of protein. *American Journal of Agricultural and Biological Sciences*, 4(4), 319–331.
- Ghosh, S., Lee, S.-M., Jung, C., & Meyer-Rochow, V. B. (2017). Nutritional composition of five commercial edible insects in South Korea. *Journal of Asia-Pacific Entomology*, 20(2), 686–694. <https://doi.org/10.1016/j.aspen.2017.04.003>
- Glew, R. H., Jackson, D., Sena, L., VanderJagt, D. J., Pastuszyn, A., & Millson, M. (1999). *Gonimbrasia belina* (Lepidoptera: Saturniidae): a Nutritional Food Source Rich in Protein, Fatty Acids, and Minerals. *American Entomologist*, 45(4), 250–253. <https://doi.org/10.1093/ae/45.4.250>
- Haber, M., Mishyna, M., Martinez, J. J. I., & Benjamin, O. (2019). *The influence of grasshopper (Schistocerca gregaria) powder enrichment on bread nutritional and sensorial properties.* <https://pubag.nal.usda.gov/catalog/6536520>

- Igbabul, B. D., Agude, C., & Inyang, C. U. (2015). Nutritional and microbial quality of dried larva of *Cirina forda*. *International Journal of Nutrition and Food Sciences*, 3(6), 602–606.
- Jonathan, A. A. (2012). *Proximate and anti-nutritional composition of two common edible insects: Yam beetle (Heteroligus meles) and palm weevil (Rhynchophorus phoenicis)*. 5.
- Khalil, R. M. (2018). *Locust (Schistocerca Gregaria) as an Alternative Source of Protein Compared with Other Conventional Protein Sources* [Thesis, Sudan University of Science and Technology]. <http://repository.sustech.edu/handle/123456789/21581>
- Kinyuru, J N, Kenji, G. M., Muhoho, S. N., & Ayieko, M. (2010). Nutritional potential of Longhorn Grasshopper (*Ruspolia Differens*) consumed in Siaya District, Kenya. *Journal of Agriculture, Science and Technology*, 15.
- Kinyuru, John N. (2020). Nutrient content and lipid characteristics of desert locust (*Schistocerca gregaria*) swarm in Kenya. *International Journal of Tropical Insect Science*. <https://doi.org/10.1007/s42690-020-00308-3>
- Kinyuru, John N., Kenji, G. M., Muhoho, S. N., & Ayieko, M. (2011). Nutritional Potential Of Longhorn Grasshopper (*Ruspolia Differens*) Consumed In Siaya District, Kenya. *Journal of Agriculture, Science and Technology*, 12(1), Article 1. <http://journals.jkuat.ac.ke/index.php/jagst/article/view/7>
- Kinyuru, John N., Kenji, G. M., Njoroge, S. M., & Ayieko, M. (2010). Effect of Processing Methods on the In Vitro Protein Digestibility and Vitamin Content of Edible Winged Termite (*Macrotermes subhylanus*) and Grasshopper (*Ruspolia differens*). *Food and Bioprocess Technology*, 3(5), 778–782. <https://doi.org/10.1007/s11947-009-0264-1>
- Kovitvadhi, A., Chundang, P., Thongprajukaew, K., Tirawattanawanich, C., Srikachar, S., & Chotimanothum, B. (2019). Potential of Insect Meals as Protein Sources for Meat-Type Ducks Based on In Vitro Digestibility. *Animals*, 9(4), 155. <https://doi.org/10.3390/ani9040155>
- Kuntadi, K., Adalina, Y., & Maharani, K. E. (2018). Nutritional Compositions of Six Edible Insects in Java. *Indonesian Journal of Forestry Research*, 5(1), 57–68. <https://doi.org/10.20886/ijfr.2018.5.1.57-68>
- Lamberti, C., Gai, F., Cirrincione, S., Giribaldi, M., Purrotti, M., Manfredi, M., Marengo, E., Sicuro, B., Saviane, A., Cappellozza, S., Giuffrida, M. G., & Cavallarin, L. (2019). Investigation of the protein profile of silkworm (*Bombyx mori*) pupae reared on a well-calibrated artificial diet compared to mulberry leaf diet. *PeerJ*, 7, e6723. <https://doi.org/10.7717/peerj.6723>
- Latunde-Dada, G. O., Yang, W., & Vera Aviles, M. (2016). In Vitro Iron Availability from Insects and Sirloin Beef. *Journal of Agricultural and Food Chemistry*, 64(44), 8420–8424. <https://doi.org/10.1021/acs.jafc.6b03286>
- Linn, W. W., Htwe, D., & Than, W. W. (2016). *Identification, Morphology, and Nutrient Composition of Edible Fungi and Insects in Myanmar* (Leaflet No. 18; pp. 1–24). Forest Department, Ministry of Natural Resources and Environmental Conservation. <https://www.forestdepartment.gov.mm/sites/default/files/Research%20Books%20file/18.%20Wah%20Linn.pdf>
- Liu, C., Masri, J., Perez, V., Maya, C., & Zhao, J. (2020). Growth Performance and Nutrient Composition of Mealworms (*Tenebrio Molitor*) Fed on Fresh Plant Materials-Supplemented Diets. *Foods*, 9(2), 151. <https://doi.org/10.3390/foods9020151>
- Longvah, T., Mangthya, K., & Ramulu, P. (2011). Nutrient composition and protein quality evaluation of eri silkworm (*Samia ricinii*) prepupae and pupae. *Food Chemistry*, 128(2), 400–403. <https://doi.org/10.1016/j.foodchem.2011.03.041>

- Madibela, O. R., Mokwena, K. K., Nsoso, S. J., & Thema, T. F. (2009). Chemical composition of Mopane worm sampled at three sites in Botswana and subjected to different processing. *Tropical Animal Health and Production*, 41(6), 935–942. <https://doi.org/10.1007/s11250-008-9282-7>
- Manyeula, F., Tsopito, C., Kamau, J., Mogotsi, K. K., Nsoso, S. J., & Moreki, J. C. (2013). Effect of *Imbrasia belina* (Westwood), *Tylosema esculentum* (Burchell) Schreiber and *Vigna subterranea* (L.) Verde as protein sources on growth and laying performance of Tswana hens raised under intensive production system. *Scientific Journal of Animal Science*, 2(1), 1–8.
- Mazumdar, M. D. (2019). A Study On Biochemical Composition Of Eri Pupae (*Pilosamia Ricini*). *International Journal of Scientific & Technology Research*, 8(12), 2189–2191.
- Mohamed, E. H. A. (2015). Determination of Nutritive Value of the Edible migratory locust *Locusta migratoria*, Linnaeus, 1758 (Orthoptera: Acrididae). *International Journal of Advances in Pharmacy, Biology, and Chemistry*, 4(1), 5.
- Moreki, J., Tiroesele, B., & Chiripasi, S. C. (2012). Prospects of utilizing insects as alternative sources of protein in poultry diets in Botswana. *Journal of Animal Science Advances*, 2, 649–658.
- Nantanga, K. K. M., & Amakali, T. (2020). Diversification of mopane caterpillars (*Gonimbrasia belina*) edible forms for improved livelihoods and food security. *Journal of Arid Environments*, 177, 104148. <https://doi.org/10.1016/j.jaridenv.2020.104148>
- Nigeria Food Database. (2019). <http://nigeriafooddata.ui.edu.ng/Database>
- Nirmala, I. R., & Pramono, M. S. (2017). Sago worms as a nutritious traditional and alternative food for rural children in Southeast Sulawesi, Indonesia. *Asia Pacific Journal of Clinical Nutrition*, 26(Supplement), S40.
- Nyambose, J., Koski, K. G., & Tucker, K. L. (2002). High intra/interindividual variance ratios for energy and nutrient intakes of pregnant women in rural Malawi show that many days are required to estimate usual intake. *The Journal of Nutrition*, 132(6), 1313–1318. <https://doi.org/10.1093/jn/132.6.1313>
- Ohtsuka, R., Kawabe, T., Inaoka, T., Suzuki, T., Hongo, T., Akimichi, T., & Sugahara, T. (1984). Composition of local and purchased foods consumed by the Gidra in Lowland Papua. *Ecology of Food and Nutrition*, 15(2), 159–169. <https://doi.org/10.1080/03670244.1984.9990820>
- Oibiokpa, F. I., Akanya, H. O., Jigam, A. A., & Saidu, A. N. (2017). Nutrient and Antinutrient Compositions of Some Edible Insect Species in Northern Nigeria. *Fountain Journal of Natural and Applied Sciences*, 6(1), Article 1. <http://fountainjournals.com/index.php/FUJNAS/article/view/159>
- Okunowo, W. O., Olagboye, A. M., Afolabi, L. O., & Oyediji, A. O. (2017). Nutritional value of *Rhynchophorus phoenicis* (F.) larvae, an edible insect in Nigeria. *African Entomology*, 25(1), 156–163. <https://doi.org/10.4001/003.025.0156>
- Oliveira, J. F. S., Carvalho, J. P. de, Sousa, R. F. X. B. de, & Simão, M. M. (1976). The nutritional value of four species of insects consumed in Angola. *Ecology of Food and Nutrition*, 5(2), 91–97. <https://doi.org/10.1080/03670244.1976.9990450>
- Omotoso, O. T. (2006). Nutritional quality, functional properties and anti-nutrient compositions of the larva of *Cirina forda* (Westwood) (Lepidoptera: Saturniidae). *Journal of Zhejiang University SCIENCE B*, 7(1), 51–55. <https://doi.org/10.1631/jzus.2006.B0051>
- Omotoso, O. T., & Adedire, C. O. (2007). Nutrient composition, mineral content and the solubility of the proteins of palm weevil, *Rhynchophorus phoenicis* f. (Coleoptera: Curculionidae). *Journal of Zhejiang University SCIENCE B*, 8(5), 318–322. <https://doi.org/10.1631/jzus.2007.B0318>



- Omotoso, O. T., & Adesola, A. A. (2018). Comparative studies of the nutritional composition of some insect orders. *International Journal of Entomology and Nematology Research*, 2(1), 1–9.
- Oonincx, D. G. a. B., & Poel, A. F. B. van der. (2011). Effects of diet on the chemical composition of migratory locusts (*Locusta migratoria*). *Zoo Biology*, 30(1), 9–16.  
<https://doi.org/10.1002/zoo.20308>
- Opara, M. N., Sanyigha, F. T., Ogbuewu, I. P., & Okoli, I. C. (2012). Studies on the production trend and quality characteristics of palm grubs in the tropical rainforest zone of Nigeria. *International Journal of Agricultural Technology*, 8(3), 851–860.
- Osasona, A. I., & Olaofe, O. (2010). Nutritional and functional properties of *Cirina forda* larva from Ado-Ekiti, Nigeria. *African Journal of Food Science*, 4(12), 775–777.  
<https://doi.org/10.5897/AJFS.9000201>
- Parker, M. E., Zobrist, S., Lutterodt, H. E., Asiedu, C. R., Donahue, C., Edick, C., Mansen, K., Pelto, G., Milani, P., Soor, S., Laar, A., & Engmann, C. M. (2020). Evaluating the nutritional content of an insect-fortified food for the child complementary diet in Ghana. *BMC Nutrition*, 6.  
<https://doi.org/10.1186/s40795-020-0331-6>
- Ramos-Elorduy, J., Moreno, J. M. P., Prado, E. E., Perez, M. A., Otero, J. L., & de Guevara, O. L. (1997). Nutritional Value of Edible Insects from the State of Oaxaca, Mexico. *Journal of Food Composition and Analysis*, 10(2), 142–157. <https://doi.org/10.1006/jfca.1997.0530>
- Rangacharyulu, P. V., Giri, S. S., Paul, B. N., Yashoda, K. P., Rao, R. J., Mahendrakar, N. S., Mohanty, S. N., & Mukhopadhyay, P. K. (2003). Utilization of fermented silkworm pupae silage in feed for carps. *Bioresource Technology*, 86(1), 29–32. [https://doi.org/10.1016/S0960-8524\(02\)00113-X](https://doi.org/10.1016/S0960-8524(02)00113-X)
- Rapatsa, M. M., & Moyo, N. A. G. (2017). Evaluation of *Imbrasia belina* meal as a fishmeal substitute in *Oreochromis mossambicus* diets: Growth performance, histological analysis and enzyme activity. *Aquaculture Reports*, 5, 18–26. <https://doi.org/10.1016/j.aqrep.2016.11.004>
- Ravzanaadii, N., Kim, S., Choi, W. H., Hong, S., & Kim, N. J. (2012). Nutritional Value of Mealworm, *Tenebrio molitor* as Food Source. *International Journal of Industrial Entomology*, 25(1), 93–98.
- Roman Viñas, B., Ribas Barba, L., Ngo, J., Gurinovic, M., Novakovic, R., Cavelaars, A., de Groot, L. C. P. G. M., van't Veer, P., Matthys, C., & Serra Majem, L. (2011). Projected prevalence of inadequate nutrient intakes in Europe. *Annals of Nutrition & Metabolism*, 59(2–4), 84–95.  
<https://doi.org/10.1159/000332762>
- Sailo, S. (2019). *Nutritional and Antinutritional Properties of Some Edible Insects of Assam* [Thesis, AAU, Jorhat]. <https://krishikosh.egranth.ac.in/handle/1/5810147674>
- Schmidt, A., Call, L.-M., Macheiner, L., & Mayer, H. K. (2019). Determination of vitamin B12 in four edible insect species by immunoaffinity and ultra-high performance liquid chromatography. *Food Chemistry*, 281, 124–129. <https://doi.org/10.1016/j.foodchem.2018.12.039>
- Siulapwa, N., Mwambungu, A., Lungu, E., & Sichilima, W. (2014). Nutritional Value of Four Common Edible Insects in Zambia. *International Journal of Science and Research*, 3(6), 9.
- Ssepunya, G., Smets, R., Nakimbugwe, D., Van Der Borgh, M., & Claes, J. (2019). Nutrient composition of the long-horned grasshopper *Ruspolia differens* Serville: Effect of swarming season and sourcing geographical area. *Food Chemistry*, 301, 125305.  
<https://doi.org/10.1016/j.foodchem.2019.125305>
- Tang, C., Yang, D., Liao, H., Sun, H., Liu, C., Wei, L., & Li, F. (2019). Edible insects as a food source: A review. *Food Production, Processing and Nutrition*, 1(1), 8.  
<https://doi.org/10.1186/s43014-019-0008-1>

- Taufek, Norhidayah M., Muin, H., Raji, A. A., Razak, S. A., Yusof, H. M., & Alias, Z. (2016). Apparent Digestibility Coefficients and Amino Acid Availability of Cricket Meal, *Gryllus bimaculatus*, and Fishmeal in African Catfish, *Clarias gariepinus*, Diet. *Journal of the World Aquaculture Society*, 47(6), 798–805. <https://doi.org/10.1111/jwas.12302>
- Taufek, Norhidayah Mohd, Muin, H., Raji, A. A., Yusof, H. M., Alias, Z., & Razak, S. A. (2018). Potential of field crickets meal (*Gryllus bimaculatus*) in the diet of African catfish (*Clarias gariepinus*). *Journal of Applied Animal Research*, 46(1), 541–546. <https://doi.org/10.1080/09712119.2017.1357560>
- Tomotake, H., Katagiri, M., & Yamato, M. (2010). Silkworm Pupae (*Bombyx mori*) Are New Sources of High Quality Protein and Lipid. *Journal of Nutritional Science and Vitaminology*, 56(6), 446–448. <https://doi.org/10.3177/jnsv.56.446>
- Tong, L., Yu, X., & Liu, H. (2011). Insect food for astronauts: Gas exchange in silkworms fed on mulberry and lettuce and the nutritional value of these insects for human consumption during deep space flights. *Bulletin of Entomological Research*, 101(5), 613–622. <https://doi.org/10.1017/S0007485311000228>
- Udomsil, N., Imsoonthornruksa, S., Gosalawit, C., & Ketudat-Cairns, M. (2019). Nutritional Values and Functional Properties of House Cricket (*Acheta domestica*) and Field Cricket (*Gryllus bimaculatus*). *Food Science and Technology Research*, 25(4), 597–605. <https://doi.org/10.3136/fstr.25.597>
- Verly Junior, E., Fisberg, R. M., Cesar, C. L. G., & Marchioni, D. M. L. (2010). Sources of variation of energy and nutrient intake among adolescents in São Paulo, Brazil. *Cadernos De Saude Publica*, 26(11), 2129–2137. <https://doi.org/10.1590/s0102-311x2010001100014>
- Yhoung-Aree, J., Puwastien, P., & Attig, G. A. (1997). Edible insects in Thailand: An unconventional protein source? *Ecology of Food and Nutrition*, 36(2–4), 133–149. <https://doi.org/10.1080/03670244.1997.9991511>
- Zhao, X., Vázquez-Gutiérrez, J. L., Johansson, D. P., Landberg, R., & Langton, M. (2016). Yellow Mealworm Protein for Food Purposes—Extraction and Functional Properties. *PLOS ONE*, 11(2), e0147791. <https://doi.org/10.1371/journal.pone.0147791>
- Zielińska, E., Baraniak, B., Karaś, M., Rybczyńska, K., & Jakubczyk, A. (2015). Selected species of edible insects as a source of nutrient composition. *Food Research International*, 77, 460–466. <https://doi.org/10.1016/j.foodres.2015.09.008>
